# Supplementary material for: Is senescence-associated β-galactosidase a marker of neuronal senescence?
Source: PubMed Central journal article supplement (PMC5348379; doi:10.18632/oncotarget.12752), 2016-10-19
Supplement: oncotarget-07-81099-s001.pdf [file oncotarget-07-81099-s001.pdf]

## Is senescence-associated $\beta$ -galactosidase a marker of neuronal senescence?

### SUPPLEMENTARY FIGURES

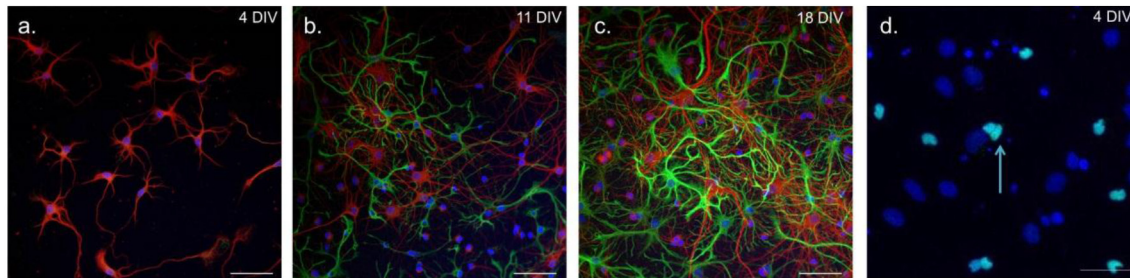

**Supplementary Figure S1: A mixed neuronal-glia culture.** The presence of neurons and glia in culture, as observed by expression of neuronal (MAP2, red) and astrocyte (GFAP, green) markers over time. 4 DIV **a**. 11 DIV **b**. 18 DIV **c**. Scale bars represent 50 $\mu$ m; The presence of oligodendrocyte precursors stained with Olig-2 antibody at 4 DIV (**d**, arrow). A scale bar represents 20 $\mu$ m.

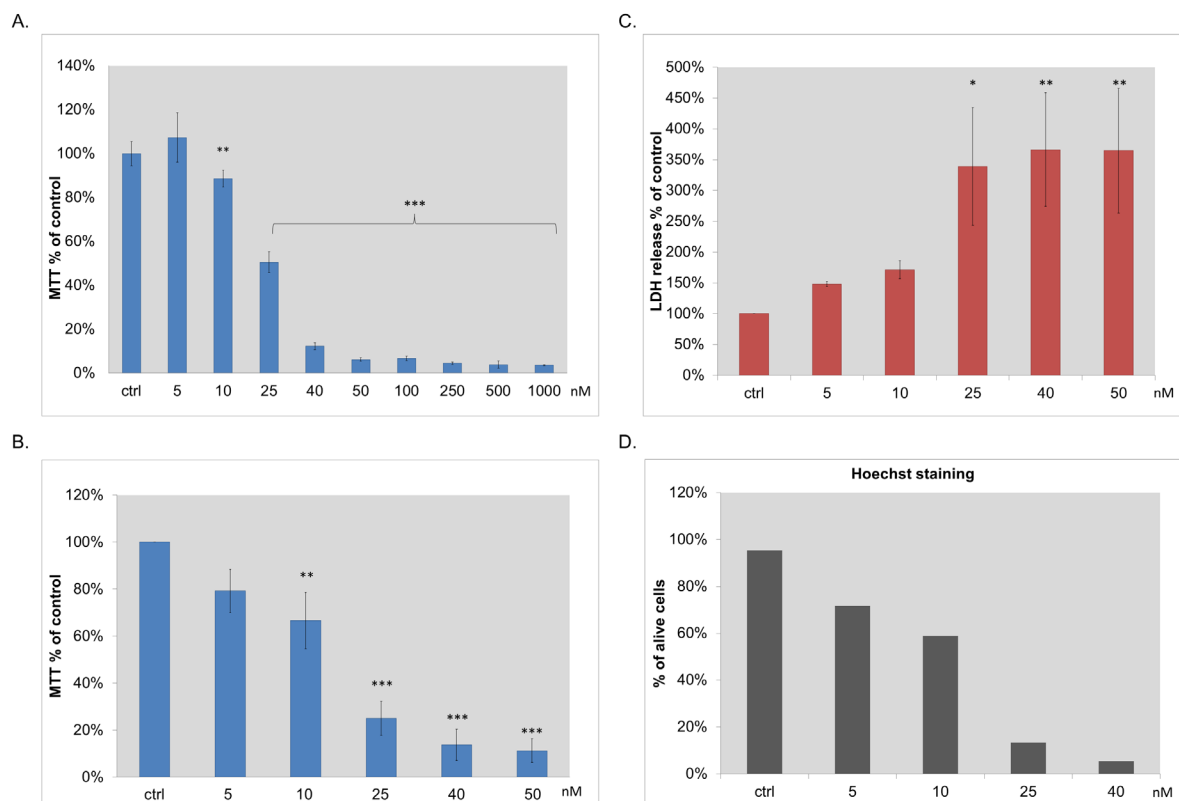

**Supplementary Figure S2: Changes in cell viability upon doxorubicin treatment.** **A.** 4 DIV cultures were treated with increasing doses of doxorubicin for 48 hours and MTT assay was performed. **B-D.** Neuronal cultures were treated with selected doses of doxorubicin for four days and viability was measured by MTT test (**B**), LDH release (**C**) or cells were fixed, stained by Hoechst 33342 and the percentage of apoptotic nuclei was counted (**D**). Values represent the mean  $\pm$  S.D. from two independent experiments \* $P < 0.05$ , \*\* $P < 0.01$ , \*\*\* $P < 0.001$  relative to control (ANOVA).
